# Supplementary material for: Synergistic effect of cocatalytic NiSe2 on stable 1T-MoS2 for hydrogen evolution
Source: Royal Society of Chemistry journal article supplement (doi:10.1039/d1ra00506e), 2021-01-01
Supplement: d1ra00506e1.pdf [file d1ra00506e1.pdf]

## Supporting Information

### **Synergistic effect of cocatalytic NiSe<sub>2</sub> on stable 1T- MoS<sub>2</sub> for hydrogen evolution**

Zhen Li,<sup>a</sup> Xinzhi Ma,<sup>a</sup> Lili Wu,<sup>\*ab</sup> Hongfeng Ye,<sup>a</sup> Lu Li,<sup>a</sup> Shuangyan Lin,<sup>c</sup> Xitian

Zhang,<sup>a</sup> Zhitao Shao,<sup>a</sup> Yue Yang<sup>a</sup> and Hong Gao<sup>\*a</sup>

*<sup>a</sup>Key Laboratory for Photonic and Electronic Bandgap Materials, Ministry of Education, School of Physics and Electronic Engineering, Harbin Normal University, Harbin 150025, China*

*<sup>b</sup>Center for Engineering Training and Basic Experimentation, Heilongjiang University of Science and Technology, Harbin 150022, China*

*<sup>c</sup>School of Chemistry, Guangdong University of Petrochemical Technology, Maoming, Guangdong, 525000, PR China*

---

\*Corresponding authors: Email: wll790107@hotmail.com; gaohong65cn@126.com.

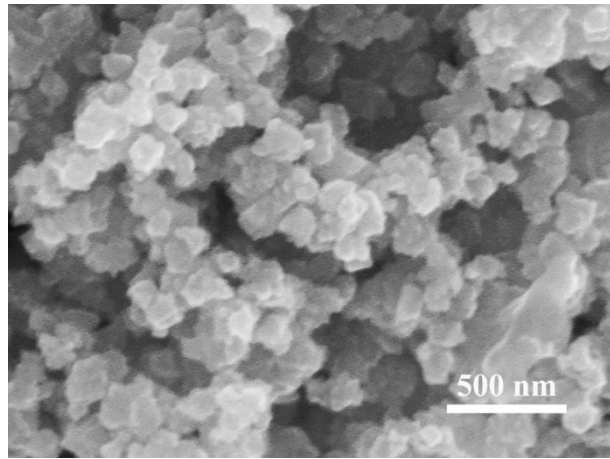

Fig. S1. SEM image of NiSe<sub>2</sub>

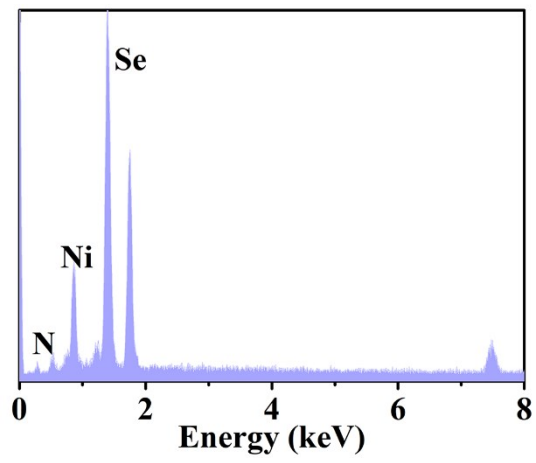

Fig. S2. EDS spectrum of bare NiSe<sub>2</sub>

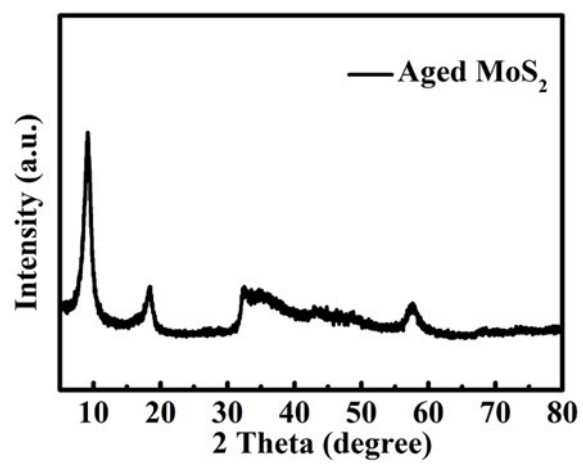

Fig. S3. XRD pattern of three-month aged bare MoS<sub>2</sub>

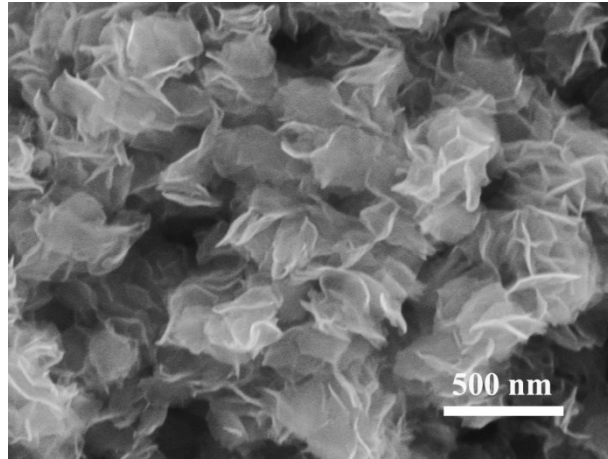

Fig. S4. SEM image of bare MoS<sub>2</sub>

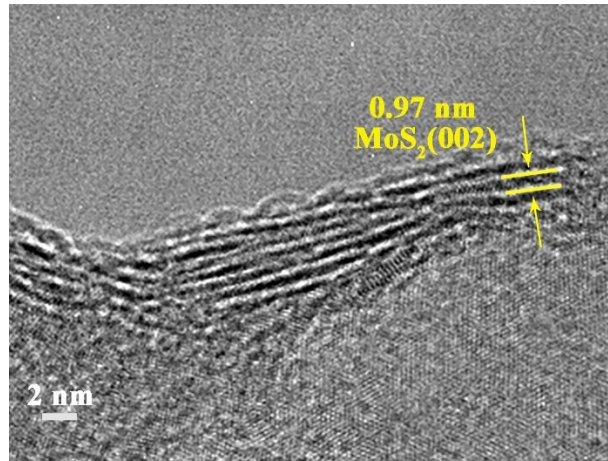

Fig. S5. High-resolution TEM image of bare MoS<sub>2</sub>

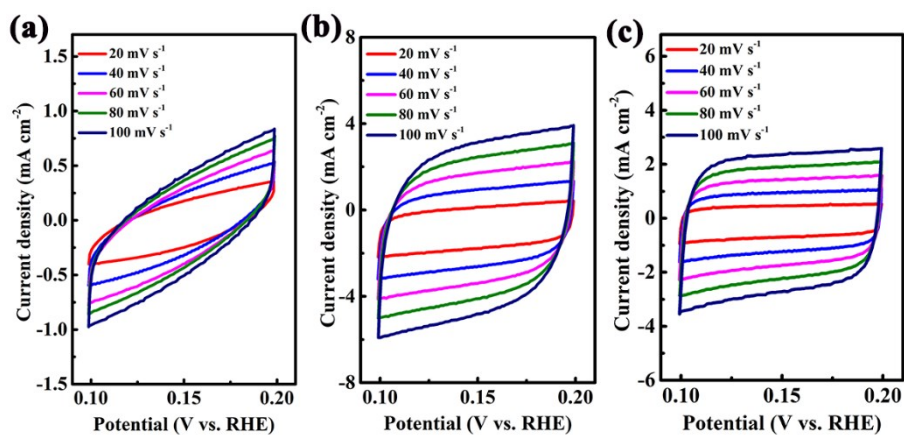

Fig. S6. Cyclic voltammetry (CV) curves of (a) NiSe<sub>2</sub>, (b) MoS<sub>2</sub>, (c) MoS<sub>2</sub>/NiSe<sub>2</sub> at different scan rate: 20, 40, 60, 80 and 100 mV s<sup>-1</sup>. Experiments were performed in 0.5 M H<sub>2</sub>SO<sub>4</sub> by sweeping the potential in non-faradic region.

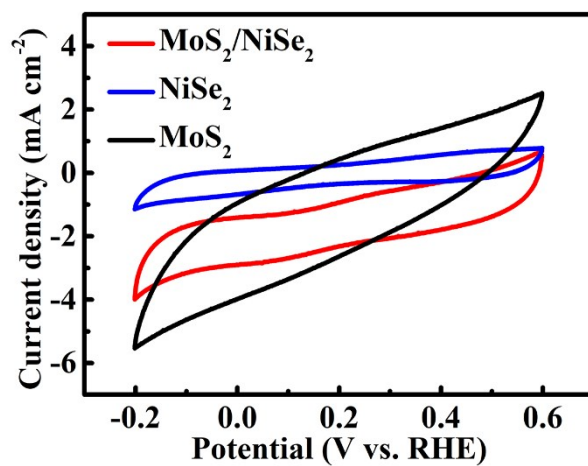

Fig. S7. Cyclic voltammetry curves of NiSe<sub>2</sub>, MoS<sub>2</sub>, MoS<sub>2</sub>/NiSe<sub>2</sub> at pH = 7 phosphate buffer with a scan rate of 50 mV s<sup>-1</sup>.



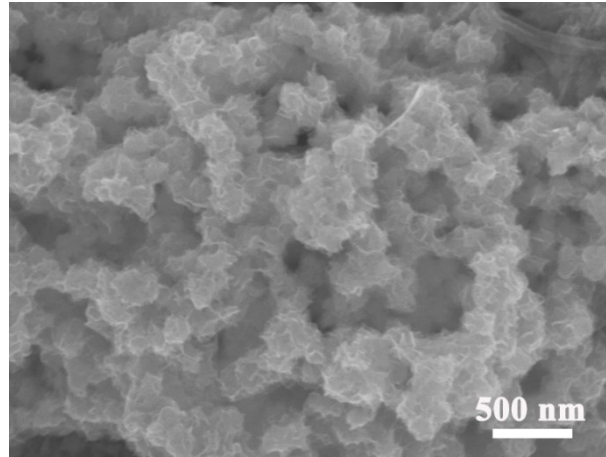

Fig. S8. SEM of MoS<sub>2</sub>/NiSe<sub>2</sub> after stability measurement.

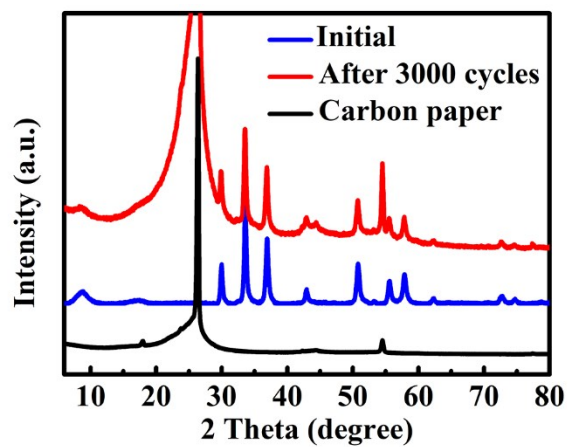

Fig. S9. XRD patterns of MoS<sub>2</sub>/NiSe<sub>2</sub> before and after stability measurement.

**Table S1** Comparison of HER performances in 0.5 M H<sub>2</sub>SO<sub>4</sub> solution for MoS<sub>2</sub>/NiSe<sub>2</sub> with other HER electrocatalysts.

| Catalyst                            | Tafel slope (mV dec <sup>-1</sup> ) | Overpotential at 10 mA cm <sup>-2</sup> (mV) | Catalyst loading (mg cm <sup>-2</sup> ) | Ref      |
|-------------------------------------|-------------------------------------|----------------------------------------------|-----------------------------------------|----------|
| MoS <sub>2</sub> /MoO <sub>2</sub>  | 129                                 | 210                                          | 0.28                                    | 1        |
| Ni <sub>2</sub> P/MoS <sub>2</sub>  | 76                                  | ~200                                         | -                                       | 2        |
| MoS <sub>2</sub> /Graphene          | 68                                  | 142                                          | 0.701                                   | 3        |
| MoS <sub>2</sub> /rGO               | 77                                  | 154                                          | 0.17                                    | 4        |
| MoSe <sub>2</sub> -NiSe@carbon      | 76.3                                | 154                                          | 0.285                                   | 5        |
| CoS <sub>2</sub> @MoS <sub>2</sub>  | 85.9                                | 290                                          | 0.285                                   | 6        |
| CoS <sub>x</sub> @MoS <sub>2</sub>  | 103                                 | 239                                          | 0.285                                   | 7        |
| NHCS@MoS <sub>2</sub>               | 96                                  | 190                                          | 0.75                                    | 8        |
| S-MoS <sub>2</sub> @C               | 78                                  | 136                                          | 1                                       | 9        |
| MCM@MoS <sub>2</sub> -Ni            | 81                                  | 161                                          | 0.49                                    | 10       |
| defect-rich MoS <sub>2</sub>        | 63                                  | 176                                          | 2.8                                     | 11       |
| MoS <sub>2</sub> nanorods           | 93                                  | 282                                          | 0.204                                   | 12       |
| MoS <sub>2</sub> /NiSe <sub>2</sub> | 58                                  | 94                                           | 1                                       | Our work |

## References

- [1] C. L. Wu, P. C. Huang, S. Brahma, J. L. Huang and S. C. Wang, *Ceram. Int.*, 2017, **43**, S621-S627.
- [2] Y. R. Liu, W. H. Hu, X. Li, B. Dong, X. Shang, G. Q. Han, Y. M. Chai, Y. Q. Liu and C. G. Liu, *Appl. Surf. Sci.*, 2016, **383**, 276-282.
- [3] L. Li, J. Li, L. Liu, X. Wang, Y. Guo and Y. Zhou, *ACS Appl. Energy Mater*, 2019, **2**, 1413-1418.
- [4] A. Kagkoura, I. Tzanidis, V. Dracopoulos, N. Tagmatarchis and D. Tasis, *Chem. Commun.*, 2019, **55**, 2078-2081.
- [5] C. Liu, K. Wang, X. Zheng, X. Liu, Q. Liang and Z. Chen, *Carbon*, 2018, **139**, 1-9.
- [6] Y. Guo, L. Gan, C. Shang, E. Wang and J. Wang, *Adv. Funct. Mater*, 2017, **27**, 1602699.
- [7] L. Yang, L. Zhang, G. Xu, X. Ma, W. Wang, H. Song and D. Jia, *ACS Sustainable Chem. Eng.*, 2018, **6**, 12961-12968.
- [8] W. Xu, W. Song, F. Liu, Z. Wang, G. Jin, C. Li, X. Yang and C. Chen, *ChemElectroChem*, 2019, **6**, 1101-1106.
- [9] Q. Xu, Y. Liu, H. Jiang, Y. Hu, H. Liu and C. Li, *Adv. Energy Mater*, 2019, **9**, 1802553.
- [10] H. Zhang, L. Yu, T. Chen, W. Zhou and X. W. Lou, *Adv. Funct. Mater*, 2018, **28**, 1807086.
- [11] L. F. Zhang, X. Ke, G. Ou, H. Wei, L. N. Wang and H. Wu, *Sci China Mater*, 2017, **60**, 849-856.
- [12] J. D. Yi, T. T. Liu, Y. B. Huang and R. Cao, *Sci China Mater*, 2019, **62**, 965-972.
